# Supplementary material
Source: PubMed Central journal article supplement (PMC4209987)
Supplement: pnas.201412269SI.pdf [file pnas.201412269SI.pdf]

# Supporting Information

Sivan et al. 10.1073/pnas.1412269111

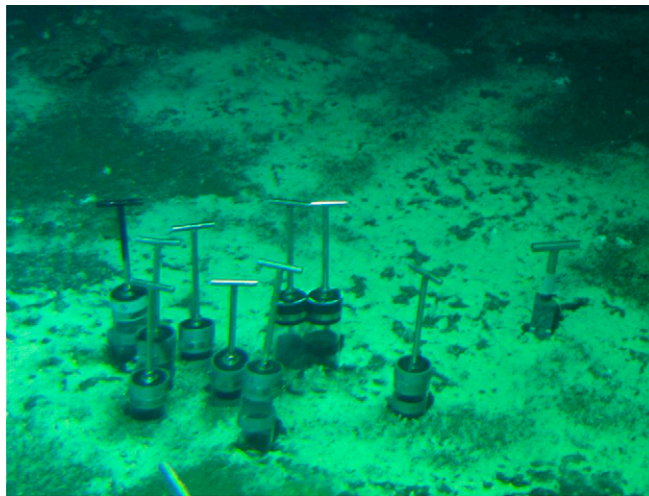

**Fig. S1.** Sample collection from a Hydrate Ridge methane seep colonized by a sulfide oxidizing bacterial mat. The push core used for this experiment (PC-9) is on the right-hand side of the cluster (diameter of the push core is ~4 in for scale).

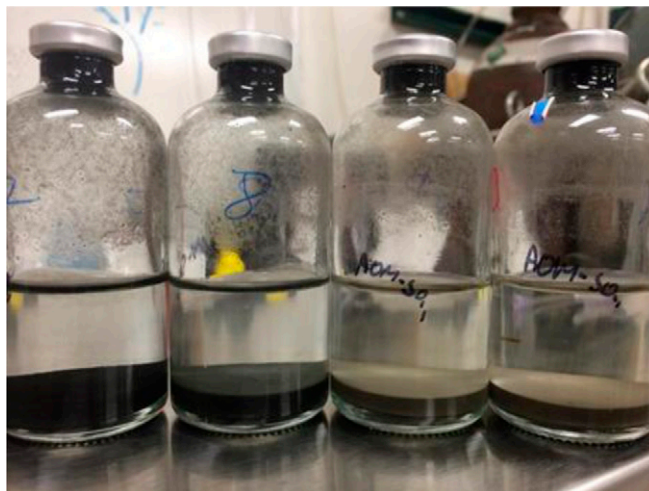

**Fig. S2.** The bottles treated with hematite addition after 180 d. The two on the *Right* are the killed control, and their color remained brown throughout the experiment, whereas the two on the *Left* have become black with time, likely due to precipitation of Fe(II) sulfide particles.

**Table S1. List of bottles used in the experiment and treatments**

| No. bottle | <sup>13</sup> C-glucose | <sup>13</sup> C-methane | Hematite | Autoclave |
|------------|-------------------------|-------------------------|----------|-----------|
| 1a         | X                       |                         |          |           |
| 1b         | X                       |                         |          |           |
| 2a         | X                       | X                       |          |           |
| 2b         | X                       | X                       |          |           |
| 3a         |                         | X                       |          |           |
| 3b         |                         | X                       |          |           |
| 4a         |                         | X                       | X        |           |
| 4b         |                         | X                       | X        |           |
| 5a         | X                       | X                       | X        | X         |
| 5b         | X                       | X                       | X        | X         |
